# Supplementary material
Source: Springer Nature journal article supplement (https://www.springermedizin.de/resource/supplementary/12885_2012_4027_MOESM11_ESM.pdf/9465002)

# Unstained Whole Mount

**A**

GFP-mouse

Ex 860

Ex 890

SHG-B  
SHG-F

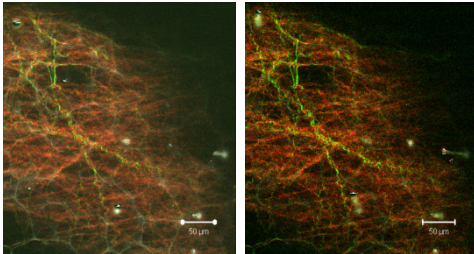

SHG-B  
Autofl  
SHG-F

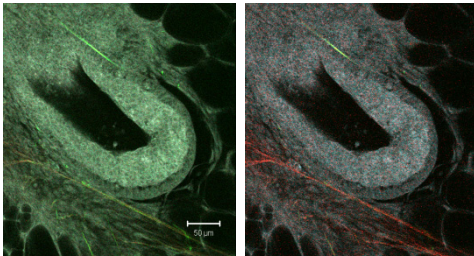

**B**

GFP-mouse

Ex 800

Em 400 peak

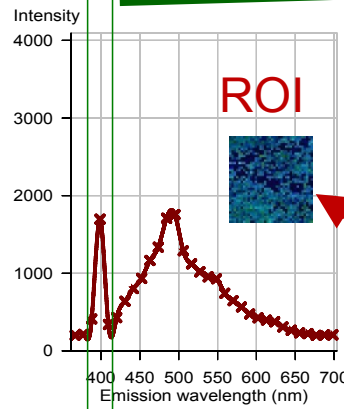

Ex 800 nm/ Em 382-414

SHG-B

50 μm

Ex 800 Em 367-698

λ coded

Ex 890

Em 445 peak

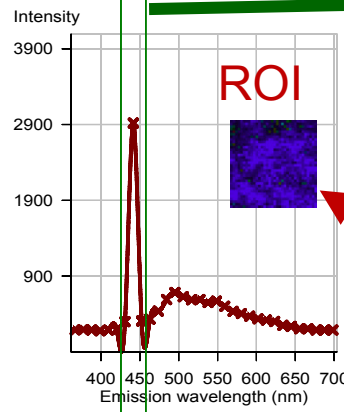

Ex 890 nm/ Em 425-457

SHG-B

50 μm

Ex 890 Em 367-698

λ coded

**C**

Ex 800

Ex 890

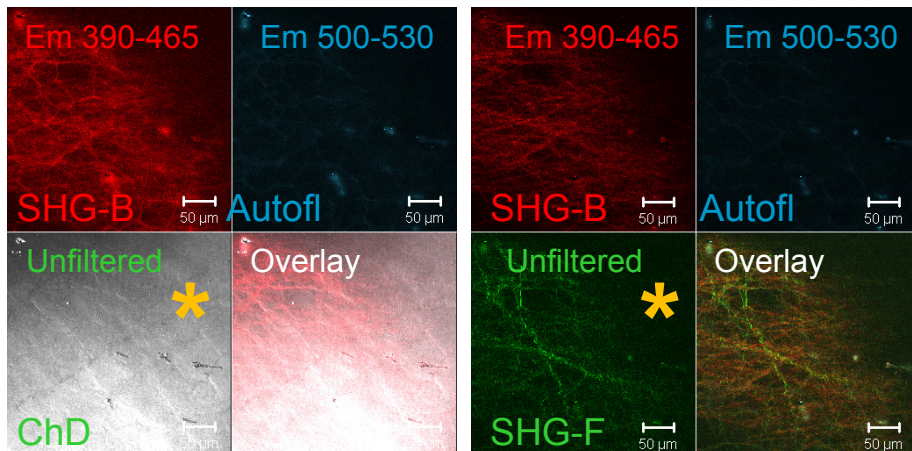

Supplement: MOESM11 [file 9465002]
